# Supplementary material for: An Epidemiological and Economic Simulation Model to Evaluate Strategies for the Control of Bovine Virus Diarrhea in Germany
Source: PubMed Central journal article supplement (PMC6877714; doi:10.3389/fvets.2019.00406), 2019-11-19
Supplement: Data_Sheet_1.pdf [file Data_Sheet_1.pdf]

# An epidemiological and economic simulation model to evaluate strategies for the control of bovine virus diarrhea in Germany

## Supplementary material

|                                                                                                                                             |    |
|---------------------------------------------------------------------------------------------------------------------------------------------|----|
| Table S1: Input parameters and distributions used in the Gross margin analysis (GMA).....                                                   | 2  |
| Table S2: Input parameters used in the animal valuation model to estimate the market value of PI animals (cows, young stock, calves). ..... | 5  |
| Table S3: Input parameters and equations used in the economic model. ....                                                                   | 6  |
| Table S4: Equations used in the benefit-cost analysis .....                                                                                 | 11 |
| Table S5: Probability of transient BVDV infections per pregnancy stage (and overall probability). ....                                      | 12 |
| Table S6: Prolongation of the calving interval (Ci) due to a transient BVDV infection on the foetus .....                                   | 12 |
| Table S7: Results of the economic model: Mean total costs (million Euros), thereof direct and indirect costs (million Euros). ....          | 13 |

Table S1: Input parameters and distributions used in the Gross margin analysis (GMA).

| Parameter                              | Unit    | Notation   | Calculation/ value/ distribution                          | References/ comments                                                                                                                                                                                        |
|----------------------------------------|---------|------------|-----------------------------------------------------------|-------------------------------------------------------------------------------------------------------------------------------------------------------------------------------------------------------------|
| Gross Margin for a dairy farm          | Euro    | GM         | $GM = R - VC$                                             |                                                                                                                                                                                                             |
| Revenues                               | Euro    | R          | $R = R_{milk} + R_{ani} + R_{man}$                        |                                                                                                                                                                                                             |
| Revenues for selling milk              | Euro    | $R_{milk}$ | $R_{milk} = my * ms * mp$                                 |                                                                                                                                                                                                             |
| annual milk yield healthy animal       | kg/cow  | my         | $my = rnorm(10000, 7087.25, 136.11)$                      | Normal distribution based on data from Federal statistical office (Destatis) on milk yield on district level 2011-2015                                                                                      |
| influence BVD infection on milk yield  | kg/cow  | imy        | $imy = my * rlnorm(10000, log(0.01), 0.008)$              | The decrease in milk yield was estimated at about 70 liters.                                                                                                                                                |
| annual milk yield BVDV infected animal | kg/cow  | $my_{BVD}$ | $my_{BVD} = my * \frac{(Ci - 60)}{(Ci_{BVD} - 60)} - imy$ | The annual milk yield for an infected animal includes the reduction of the milk yield due to acute symptoms as well as the reduction caused by a prolonged calving interval                                 |
| proportion of milk sold                | %       |            | $ms = 95$                                                 | Destatis: milk sold on district level 2011-2015                                                                                                                                                             |
| Milk price                             | Euro/kg | Mp         | $mp = dUnif(0.289082, 0.360424)$                          | Uniform distribution based on data from Federal Ministry of Food and Agriculture; BLE: monthly average milk prices on federal state level                                                                   |
| Revenues for selling animals           | Euro    | $R_{ani}$  | $R_{ani} = R_{calf} + R_{cow}$                            |                                                                                                                                                                                                             |
| Revenues from calf sale                | Euro    | $R_{calf}$ | $R_{calf} = CC * p_{mc} * r + CC * p_{fc} * (1 - r)$      |                                                                                                                                                                                                             |
| number of calves per cow               | n       | CC         | $CC = \frac{365}{Ci} - \frac{365}{Ci * cm_y}$             |                                                                                                                                                                                                             |
| price male calf                        | Euro    | $p_{mc}$   | $p_{mc} = dTri(80.94, 121.41, 105.22)$                    | Betriebsplanung Landwirtschaft 2014/15, KTBL: price for 14 days old calves                                                                                                                                  |
| price female calf                      | Euro    | $p_{fc}$   | $p_{fc} = dTri(30.35, 60.70, 44.52)$                      |                                                                                                                                                                                                             |
| male/female ratio                      | ratio   | R          | $r = 0.5$                                                 | Estimated                                                                                                                                                                                                   |
| Revenues from cow sale                 | Euro    | $R_{cow}$  | $R_{cow} = (pC * wC - mC) * (1 - CM) * RR$                |                                                                                                                                                                                                             |
| price slaughter cow                    | Euro/kg | pC         | $pC = 2.05$                                               | Bavarian State Research Centre for Agriculture, Bayerische Landesanstalt für Landwirtschaft <a href="https://www.stmelf.bayern.de/idb/vergleiche.html">https://www.stmelf.bayern.de/idb/vergleiche.html</a> |
| average weight of a slaughter cow      | kg      | wC         | $wC = 326.46$                                             |                                                                                                                                                                                                             |
| marketing costs of a cow               | Euro    | mC         | $mC = 21$                                                 |                                                                                                                                                                                                             |
| cow mortality                          | ratio   | CM         | $CM = 0.054$                                              |                                                                                                                                                                                                             |
| replacement rate                       | ratio   | RR         | $RR = 0.33$                                               | Bayerische Landesanstalt für Landwirtschaft, <a href="https://www.stmelf.bayern.de/idb/vergleiche.html">https://www.stmelf.bayern.de/idb/vergleiche.html</a>                                                |

|                                                                                                  |        |             |                                                                                    |                                                                                                                                                                                                                                                  |
|--------------------------------------------------------------------------------------------------|--------|-------------|------------------------------------------------------------------------------------|--------------------------------------------------------------------------------------------------------------------------------------------------------------------------------------------------------------------------------------------------|
| calving interval healthy animal                                                                  | days   | Ci          | $Ci = dTri(376, 417, 458)$                                                         | Triangle distribution based on data from HI Tier                                                                                                                                                                                                 |
| calving interval with <b>BVD</b> infection                                                       | days   | $Ci_{BVD}$  | $Ci_{BVD} = Ci + iCi_{BVD}$                                                        |                                                                                                                                                                                                                                                  |
| calf mortality                                                                                   | ratio  | cm          | cm = 0.1                                                                           | fixed based on data from Bayerische Landesanstalt für Landwirtschaft,<br><a href="https://www.stmelf.bayern.de/idb/vergleiche.html">https://www.stmelf.bayern.de/idb/vergleiche.html</a>                                                         |
| influence of BVD infection on calf mortality                                                     | ratio  | icm         | icm = 0.1                                                                          |                                                                                                                                                                                                                                                  |
| calf mortality with <b>BVD</b> infection                                                         | ratio  | $cm_{BVD}$  | $cm_{BVD} = cm + icm$                                                              |                                                                                                                                                                                                                                                  |
| increased calving interval (additional number of days) in case of transient <b>BVD</b> infection | days   | $iCi_{BVD}$ | $iCi_{BVD} = lnorm(log(10.5), log(2))$                                             | $iCi_{BVD}$ is assumed as log normal distribution to increase about 13 days on average. Estimated based on (Burgstaller et al., 2016; Viet et al., 2004).                                                                                        |
| Revenues for selling manure                                                                      | Euro   | $R_{man}$   | $R_{man} = 111.1$                                                                  | Fixed (based on data of the Bavarian State Research Centre for Agriculture,<br>Bayerische Landesanstalt für Landwirtschaft;<br><a href="https://www.stmelf.bayern.de/idb/vergleiche.html">https://www.stmelf.bayern.de/idb/vergleiche.html</a> ) |
| Variable Costs                                                                                   | Euro   | VC          | $VC = VCR_y + VCfe_y + VCcr_y + VCvet_y + VCbio_y + VCins_y + VCmach_y + VCmisc_y$ |                                                                                                                                                                                                                                                  |
| Variable Costs for restocking per year                                                           | Euro   | $VCR_y$     | $VCR_y = (p_h + m_h) * RR$                                                         |                                                                                                                                                                                                                                                  |
| price for a heifer                                                                               | Euro   | $p_h$       | $p_h = 1,950$                                                                      | Fixed (based on data of the Bavarian State Research Centre for Agriculture,<br>Bayerische Landesanstalt für Landwirtschaft;<br><a href="https://www.stmelf.bayern.de/idb/vergleiche.html">https://www.stmelf.bayern.de/idb/vergleiche.html</a> ) |
| marketing costs for a heifer                                                                     | Euro   | $m_h$       | $m_h = 33$                                                                         |                                                                                                                                                                                                                                                  |
| Variable Costs for feed per year                                                                 | Euro   | $VCfe_y$    | $VCfe_y = \frac{my - my_f}{ef_{con} * p_{con}}$                                    |                                                                                                                                                                                                                                                  |
| milk yield from forage                                                                           | kg     | $my_f$      | $my_f = \frac{(f_u * f_q - bmr)}{mf}$                                              |                                                                                                                                                                                                                                                  |
| Forage uptake per year                                                                           | kg     | $f_u$       | $f_u = 4562.5$                                                                     | Fixed (based on data of the Bavarian State Research Centre for Agriculture,<br>Bayerische Landesanstalt für Landwirtschaft;<br><a href="https://www.stmelf.bayern.de/idb/vergleiche.html">https://www.stmelf.bayern.de/idb/vergleiche.html</a> ) |
| Forage quality                                                                                   | factor | $f_q$       | $f_q = 5.9$                                                                        |                                                                                                                                                                                                                                                  |
| milk per kg forage                                                                               | factor | mf          | $mf = 3.3$                                                                         |                                                                                                                                                                                                                                                  |
| basal metabolic rate                                                                             | MJ     | bmr         | $bmr = 15300$                                                                      |                                                                                                                                                                                                                                                  |
| efficiency of concentrate use                                                                    | l/kg   | $ef_{con}$  | $ef_{con} = rtri(niteration, 1.7, 2, 1.9)$                                         |                                                                                                                                                                                                                                                  |

|                                                     |         |            |                            |                                                                                                                                                                                                                                            |
|-----------------------------------------------------|---------|------------|----------------------------|--------------------------------------------------------------------------------------------------------------------------------------------------------------------------------------------------------------------------------------------|
| price for feed concentrates                         | Euro/kg | $p_{con}$  | $p_{con} = 0.28$           | Fixed (based on data of the Bavarian State Research Centre for Agriculture, Bayerische Landesanstalt für Landwirtschaft)                                                                                                                   |
| Variable Costs for calf rearing per year            | Euro    | $VCcr_y$   | $VCcr_y = 57.66$           | Fixed (based on data of the Bavarian State Research Centre for Agriculture, Bayerische Landesanstalt für Landwirtschaft; <a href="https://www.stmelf.bayern.de/idb/vergleiche.html">https://www.stmelf.bayern.de/idb/vergleiche.html</a> ) |
| Variable Costs for veterinary treatment per year    | Euro    | $VCvet_y$  | $VCvet_y = 165$            |                                                                                                                                                                                                                                            |
| Variable Costs for water and electricity per year   | Euro    | $VCwa_y$   | $VCwa_y = 75.63$           |                                                                                                                                                                                                                                            |
| Variable Costs for artificial insemination per year | Euro    | $VCins_y$  | $VCins_y = 9.41$           |                                                                                                                                                                                                                                            |
| Variable Costs for machines per year                | Euro    | $VCmach_y$ | $VCmach_y = 58.82$         |                                                                                                                                                                                                                                            |
| Variable Costs, miscellaneous (dues) per year       | Euro    | $VCmisc_y$ | $VCmisc_y = 36.13$         |                                                                                                                                                                                                                                            |
| Direct Costs per TI animal                          | Euro    | $DC_{TI}$  | $DC_{TI} = GM_h - GM_{TI}$ | The GM for a healthy animal ( $GM_h$ ) and TI animal ( $GM_{TI}$ ) are calculated using equation 1                                                                                                                                         |

Table S2: Input parameters used in the animal valuation model to estimate the market value of PI animals (cows, young stock, calves).

| Parameter                                                            | Unit     | Notation | Calculation/ value/ distribution                                                                                                       | References/ comments                                                                                                                                                                         |
|----------------------------------------------------------------------|----------|----------|----------------------------------------------------------------------------------------------------------------------------------------|----------------------------------------------------------------------------------------------------------------------------------------------------------------------------------------------|
| market value of a cow                                                | Euro     | $vc_y$   | $vc_y = B \times (1 + bp + mp + ib + da + p + c) + m$                                                                                  | based on the <a href="#">data provided by the chamber of agriculture of North-Rhine-Westphalia</a>                                                                                           |
| Basic value                                                          | Euro     | B        |                                                                                                                                        |                                                                                                                                                                                              |
| depreciation for not being registered in a breeding program          | per cent | bp       | $bp = -10$                                                                                                                             |                                                                                                                                                                                              |
| depreciation for not being included in a milk inspection program     | per cent | mp       | $mp = -30$                                                                                                                             | According to <a href="http://milchwirtschaft.de/">http://milchwirtschaft.de/</a> , in 2014 88% of all German dairy cows were included in the milk inspection program (Milchleistungsprüfung) |
| depreciation for not being free of infectious bovine rhinotracheitis | per cent | ib       | $ib = -10$                                                                                                                             |                                                                                                                                                                                              |
| depreciation according to the age of the animal                      | per cent | da       | $da = -10 - -40$                                                                                                                       | We used 1-month age groups. According to HIT, the age distribution was as follows: 65 % of the animals were 3-6 years; 15 % 6-7 years; 7% 7-8 years; 5% 8-9 years; 0.07 >9 years.            |
| premium for pregnancy status                                         | per cent | p        | $p = \begin{cases} 0, & < 4 \text{ months} \\ 4, & \geq 4 \text{ months} \\ 8, & \geq 6 \text{ months} \end{cases}$                    | we assumed that a cow will gain a bonus of 0.04 for 4 month per year (4-7 months pregnant) and 0.08 for two month per year (8-9 months pregnant).                                            |
| premium for general body condition                                   | per cent | c        | $c = 4$                                                                                                                                | For each point above a body condition of 80                                                                                                                                                  |
| premium for milk protein                                             | Euro     | m        | $m = \begin{cases} 0, & = \text{average} \\ 4 \text{ per kg}, & > \text{average} \\ -4 \text{ per kg}, & < \text{average} \end{cases}$ | 4 € for each kg above-average, -4 € for each kg below-average                                                                                                                                |
| market value of a calf or young stock per year                       | Euro     | $vy_y$   | $vy_y = 0.2 * (B * (1 + c) + m) + \frac{(B * (1 + c) + m) - 0,2 * (B * (1 + c) + m)}{afc} \times a$                                    |                                                                                                                                                                                              |
| age at first calving of the mother                                   | months   | afc      | $afc = 28$                                                                                                                             | fixed value                                                                                                                                                                                  |
| age of the animal                                                    | months   | a        |                                                                                                                                        |                                                                                                                                                                                              |

Table S3: Input parameters and equations used in the economic model.

| Parameter                                                                                  | Notation                                                                 | Calculation/ value/ distribution                                     | References/ comments                                                                                                                                                                                                                                                                                                                                                                                                             |
|--------------------------------------------------------------------------------------------|--------------------------------------------------------------------------|----------------------------------------------------------------------|----------------------------------------------------------------------------------------------------------------------------------------------------------------------------------------------------------------------------------------------------------------------------------------------------------------------------------------------------------------------------------------------------------------------------------|
| Total Costs of BVD for the 20-year period 2011-2030 in each scenario                       | $CT_s$                                                                   | $CT_s = \sum_{y=2011}^{2030} DC_{y,s} + IC_{y,s}$                    |                                                                                                                                                                                                                                                                                                                                                                                                                                  |
| Total Costs of BVD per year in each scenario                                               | $CT_{y,s}$                                                               | $CT_{y,s} = DC_{y,s} + IC_{y,s}$                                     |                                                                                                                                                                                                                                                                                                                                                                                                                                  |
| Direct Costs of BVD per year in each scenario                                              | $DC_{y,s}$                                                               | $DC_{y,s} = DCPI_{y,s} + DCTI_{y,s}$                                 |                                                                                                                                                                                                                                                                                                                                                                                                                                  |
| Direct Costs incurred by PIs per year in each scenario                                     | $DCPI_{y,s}$                                                             | $DCPI_{y,s} = DCPIc_{y,s} + DCPIy_{y,s} + DCPIh_{y,s} + DCPIc_{y,s}$ | Includes the market value of animals that die due to a persistent BVDV infection (e.g. due to Mucosal disease), disposal costs of these dead animals, and veterinary costs.                                                                                                                                                                                                                                                      |
| Direct Costs PI calves                                                                     | $DCPIc_{y,s}$                                                            | $DCPIc_{y,s} = n_{PIc_{y,s}} * C_{PI}$                               |                                                                                                                                                                                                                                                                                                                                                                                                                                  |
| Direct Costs PI young cattle                                                               | $DCPIy_{y,s}$                                                            | $DCPIy_{y,s} = n_{PIy_{y,s}} * C_{PI}$                               |                                                                                                                                                                                                                                                                                                                                                                                                                                  |
| Direct Costs PI heifers                                                                    | $DCPIh_{y,s}$                                                            | $DCPIh_{y,s} = n_{PIh_{y,s}} * C_{PI}$                               |                                                                                                                                                                                                                                                                                                                                                                                                                                  |
| Direct Costs PI cows                                                                       | $DCPIC_{y,s}$                                                            | $DCPIC_{y,s} = n_{PIC_{y,s}} * C_{PI}$                               | At the level of the national livestock sector, studies indicated a loss due to BVDV under endemic conditions of € 15-20 per cow present (Anonymus, 2001)                                                                                                                                                                                                                                                                         |
| number of PI calves, young stock, heifers, and cows respectively per year in each scenario | $n_{PIc_{y,s}}$<br>$n_{PIy_{y,s}}$<br>$n_{PIh_{y,s}}$<br>$n_{PIC_{y,s}}$ |                                                                      | Calculated in the DSM (using 1-month age groups). According to the age, animals were categorized as calves (0-6 months), young cattle (7-18 months), heifers (19-28 months), and cows (older than 29 months).                                                                                                                                                                                                                    |
| average direct costs per PI animal                                                         | $C_{PI}$                                                                 | $C_{PI} = vet_{PI} + pd_{PI}$                                        |                                                                                                                                                                                                                                                                                                                                                                                                                                  |
| costs of veterinary treatment of a PI animal                                               | $vet_{PI}$                                                               | Triangle distribution (27.50; 36.10; 72.70)                          | Include travel costs, clinical examination and advice, one injection/ infusion, and antibiotic treatment. As per current legal framework (German veterinary fee schedule, <i>Gebührenordnung für Tierärzte</i> ), veterinarians may charge travel costs of 2.30 € per double km (minimum of 8,60 €). Examination and advice amount to 11.46 to 34.38 €, injection/ infusion to 3.44 to 10.32, and antibiotic treatment to 4-5 €. |

|                                                                                                                       |                                                                          |                                                                      |                                                                                                                                                                                                               |
|-----------------------------------------------------------------------------------------------------------------------|--------------------------------------------------------------------------|----------------------------------------------------------------------|---------------------------------------------------------------------------------------------------------------------------------------------------------------------------------------------------------------|
| costs and lost value through premature death of a PI animal                                                           | $pd_{PI}$                                                                | $pd_{PI} = v_c + d_c$                                                |                                                                                                                                                                                                               |
| market value of a dead animal                                                                                         | $v_c$                                                                    |                                                                      | Calculated in the animal valuation model                                                                                                                                                                      |
| disposal costs (calf, young stock, cow)                                                                               | $d_c, d_y, d_c$                                                          | calf 7.80 €; young stock, heifer 35.10 €; cow 68.90 €                | Fixed values                                                                                                                                                                                                  |
| Direct Costs incurred by TIs per year in each scenario                                                                | $DCTI_{y,s}$                                                             | $DCTI_{y,s} = DCTIc_{y,s} + DCTIy_{y,s} + DCTIh_{y,s} + DCTIC_{y,s}$ | Include production losses                                                                                                                                                                                     |
| Direct Costs TI calves                                                                                                | $DCTIc_{y,s}$                                                            | $DCTIc_{y,s} = n_{TIc_{y,s}} * DCTIa_c$                              |                                                                                                                                                                                                               |
| Direct Costs TI young cattle                                                                                          | $DCTIy_{y,s}$                                                            | $DCTIy_{y,s} = n_{TIy_{y,s}} * DCTIa_y$                              |                                                                                                                                                                                                               |
| Direct Costs TI heifers                                                                                               | $DCTIh_{y,s}$                                                            | $DCTIh_{y,s} = n_{TIh_{y,s}} * DCTIa_h$                              |                                                                                                                                                                                                               |
| Direct Costs TI cows                                                                                                  | $DCTIC_{y,s}$                                                            | $DCTIC_{y,s} = n_{TIC_{y,s}} * DCTIa_c$                              |                                                                                                                                                                                                               |
| number of TI calves, young cattle, heifers, and cows respectively per year in each scenario                           | $n_{TIc_{y,s}}$<br>$n_{TIy_{y,s}}$<br>$n_{TIh_{y,s}}$<br>$n_{TIC_{y,s}}$ |                                                                      | Calculated in the DSM (using 1-month age groups). According to the age, animals were categorized as calves (0-6 months), young cattle (7-18 months), heifers (19-28 months), and cows (older than 29 months). |
| Direct Costs TI: average production losses incurred per calf                                                          | $DCTIa_c$                                                                | Uniform distribution (0;10)                                          |                                                                                                                                                                                                               |
| Direct Costs TI: average production losses incurred per young cattle                                                  | $DCTIa_y$                                                                | Uniform distribution (0;10)                                          |                                                                                                                                                                                                               |
| Direct Costs TI: average production losses incurred per heifer                                                        | $DCTIa_h$                                                                | Resampling from GMA results                                          | Calculated in the GMA for a heifer (Resampling done randomly with replacement).                                                                                                                               |
| Direct Costs TI: average production losses incurred per cow                                                           | $DCTIa_c$                                                                | Resampling from GMA results                                          | Calculated in the GMA for a cow (Resampling done randomly with replacement).                                                                                                                                  |
| Indirect Costs of BVD per year in each scenario                                                                       | $IC_{y,s}$                                                               | $IC_{y,s} = ICdi_{y,s} + ICva_{y,s} + ICps_{y,s} + Ictr_{y,s}$       |                                                                                                                                                                                                               |
| Indirect Costs incurred by diagnostic measures per year in each scenario                                              | $ICdi_{y,s}$                                                             | $ICdi_{y,s} = ICdidt_{y,s} + ICdidb_{y,s} + ICindb_{y,s}$            |                                                                                                                                                                                                               |
| Indirect Costs incurred by antigen analysis (direct detection) by tissue sampling (ear tag) per year in each scenario | $ICdidt_{y,s}$                                                           | $ICdidt_{y,s} = (n_{t1_{y,s}} * C_{t1}) + (n_{t2_{y,s}} * C_{t2})$   |                                                                                                                                                                                                               |

|                                                                                                            |                |                                                                  |                                                                                                                                                                        |
|------------------------------------------------------------------------------------------------------------|----------------|------------------------------------------------------------------|------------------------------------------------------------------------------------------------------------------------------------------------------------------------|
| number of animals tested (ear tag, first (1) application)                                                  | $n_{t1y,s}$    |                                                                  | calculated in the DSM                                                                                                                                                  |
| Costs antigen detection ear tags, first (1) analysis                                                       | $C_{t1}$       | $C_{t1} = c_{t1} + c_p/5 + c_{sh} + c_{ELI1} + c_c$              |                                                                                                                                                                        |
| costs diagnostic ear tags, first (1) application                                                           | $C_{t1}$       | Triangle distribution (3;4;5)                                    | According to Landeskontrollverband Baden-Württemberg: 1,12 € for two ear tags; 0.51 € shipping; 3.60 € laboratory testing; 1.80 € diagnostic material (Anonymus, 2010) |
| cost ear tag pliers                                                                                        | $C_p$          | Triangle distribution (15; 20; 25) / 5                           | Costs for ear tag pliers according to Sächsischer Landeskontrollverband; We accounted for one fifth of the costs, since pliers can be used for several animals.        |
| costs shipping                                                                                             | $C_{sh}$       | Triangle distribution (0.1; 0.2; 0.5)                            |                                                                                                                                                                        |
| costs laboratory analysis (ELISA), first (1) test                                                          | $C_{ELI1}$     | Triangle distribution (3.5; 4.5; 5.5)                            |                                                                                                                                                                        |
| costs communication of the test result                                                                     | $C_c$          | Triangle distribution (0.2; 0.4; 0.8)                            |                                                                                                                                                                        |
| number of animals tested (ear tag, second (2) application)                                                 | $n_{t2y,s}$    |                                                                  |                                                                                                                                                                        |
| Costs antigen detection ear tags, second (2) analysis                                                      | $C_{t2}$       | $C_{t2} = c_{t2} + c_{ELI2}$                                     |                                                                                                                                                                        |
| costs diagnostic ear tags, second (2) application                                                          | $C_{t2}$       | Uniform distribution (1.45; 2)                                   |                                                                                                                                                                        |
| costs laboratory analysis (ELISA), second (2) test                                                         | $C_{ELI2}$     | Fixed value (15)                                                 |                                                                                                                                                                        |
| Indirect Costs incurred by antigen analysis (direct detection) by blood sampling per year in each scenario | $ICdidb_{y,s}$ | $ICdidb_{y,s} = (n_{dby,s} * C_{db}) + (n_{fdb_{y,s}} * C_{fb})$ |                                                                                                                                                                        |
| number of animals tested (direct detection) by blood (antigen)                                             | $n_{dby,s}$    |                                                                  | calculated in the DSM                                                                                                                                                  |
| Costs direct detection by blood (antigen) per animal                                                       | $C_{db}$       | $C_{db} = c_{bs} + c_{PCR}$                                      |                                                                                                                                                                        |
| Costs blood sampling                                                                                       | $C_{bs}$       | Triangle distribution (3;7;10)                                   | According to the official scale of fees for veterinarians (Gebührenordnung für Tierärzte)                                                                              |
| Costs laboratory analysis (PCR)                                                                            | $C_{PCR}$      | Triangle distribution (5;8;11)                                   |                                                                                                                                                                        |



|                                                                                                              |                   |                                                                                               |                                                                                                                                |
|--------------------------------------------------------------------------------------------------------------|-------------------|-----------------------------------------------------------------------------------------------|--------------------------------------------------------------------------------------------------------------------------------|
| number of farms sampled (for direct detection in blood samples)                                              | $n_{fdb_{y,s}}$   |                                                                                               | calculated in the DSM                                                                                                          |
| Costs per farm for blood sampling                                                                            | $C_{fb}$          | $C_{fb} = c_{hf} + c_s + c_{sh} + c_c$                                                        |                                                                                                                                |
| costs herd fee                                                                                               | $C_{hf}$          | Triangle distribution (17;19;23)                                                              | Herd fee charged for blood sampling by veterinarians are ... Euros per callout and includes travel costs and veterinary advice |
| costs sample handling                                                                                        | $C_s$             | Fixed (2)                                                                                     |                                                                                                                                |
| costs sample shipping                                                                                        | $C_{sh}$          | Triangle distribution (0.1; 0.2; 0.5)                                                         |                                                                                                                                |
| costs communication of the test result                                                                       | $C_c$             | Triangle distribution (0.2; 0.4; 0.8)                                                         |                                                                                                                                |
| Indirect Costs incurred by antibody testing (indirect detection) by blood sampling per year in each scenario | $IC_{indb_{y,s}}$ | $IC_{indb_{y,s}} = (n_{iby,s} * C_{ib}) + (n_{fiby,s} * C_{fb})$                              |                                                                                                                                |
| number of animals tested (indirect detection) by blood (antibodies)                                          | $n_{iby,s}$       |                                                                                               | calculated in the DSM                                                                                                          |
| Costs antibody testing (indirect detection) by blood per animal                                              | $C_{ib}$          | $C_{ib} = c_{bs} + c_{ELISA}$                                                                 |                                                                                                                                |
| costs laboratory analysis (ELISA)                                                                            | $C_{ELISA}$       | Triangle distribution (8; 9; 10)                                                              |                                                                                                                                |
| number of farms sampled (for indirect detection in blood)                                                    | $n_{fiby,s}$      |                                                                                               | calculated in the DSM                                                                                                          |
| Indirect Costs incurred by vaccination per year in each scenario                                             | $IC_{va_{y,s}}$   | $IC_{va_{y,s}} = (n_{vafy,s} * C_{vaf}) + (n_{vaiy,s} * n_{vi} * c_{va} + c_{vacc})$          |                                                                                                                                |
| number of vaccinated farms                                                                                   | $n_{vafy,s}$      |                                                                                               | calculated in the DSM                                                                                                          |
| Costs for vaccination, farm level                                                                            | $C_{vaf}$         | $C_{vaf} = c_{hf}$                                                                            | Herd fee charged for vaccination by veterinarians are ... Euros per callout and includes travel costs and veterinary advice    |
| number of vaccinated animals                                                                                 | $n_{vaiy,s}$      |                                                                                               | calculated in the DSM                                                                                                          |
| number of vaccinations (immunisations) per animal                                                            | $n_{vi}$          | Triangle distribution (1.2;1.25;1.33)                                                         |                                                                                                                                |
| costs for one vaccine                                                                                        | $C_{va}$          | Triangle distribution (3;4;5)                                                                 | Vaccine: (Pape, 2000)                                                                                                          |
| costs for vaccinating one animal                                                                             | $C_{vacc}$        | Triangle distribution (1;1.4;1.8)                                                             |                                                                                                                                |
| Indirect Costs incurred by preventive slaughter of PIs per year in each scenario                             | $IC_{ps_{y,s}}$   | $IC_{ps_{y,s}} = (nsPIC_{y,s} * v_{PIC}) + (nsPII_{y,s} * v_{PII}) + (nsPIC_{y,s} * v_{PIC})$ |                                                                                                                                |

|                                                                                                                 |                                                                      |                                       |                                                                                                                                                                                                                                                                                                                                                                                                                                                                                               |
|-----------------------------------------------------------------------------------------------------------------|----------------------------------------------------------------------|---------------------------------------|-----------------------------------------------------------------------------------------------------------------------------------------------------------------------------------------------------------------------------------------------------------------------------------------------------------------------------------------------------------------------------------------------------------------------------------------------------------------------------------------------|
| number of preventively slaughtered <b>PI</b> calves (0-6 months), young cattle (6-24 months), cows (>24 months) | nsPIC <sub>y,s</sub><br>nsPIy <sub>y,s</sub><br>nsPIC <sub>y,s</sub> |                                       | calculated in the DSM                                                                                                                                                                                                                                                                                                                                                                                                                                                                         |
| compensation (value) for preventive slaughtering a <b>PI</b> calf                                               | V <sub>PIc</sub>                                                     | Uniform distribution (18;75)          | Based on the compensation for preventive slaughtering (“Merzungsbeihilfe”) provided by the animal health insurances (Tierseuchenkassen). Compensation depends among other factors, on the breed, gender and age of the animal.                                                                                                                                                                                                                                                                |
| Compensation (value) for preventive slaughtering a <b>PI</b> young cattle                                       | V <sub>PIy</sub>                                                     | Uniform distribution (3;150)          |                                                                                                                                                                                                                                                                                                                                                                                                                                                                                               |
| Compensation (value) for preventive slaughtering a <b>PI</b> Cow                                                | V <sub>PIc</sub>                                                     | Uniform distribution (150;400)        |                                                                                                                                                                                                                                                                                                                                                                                                                                                                                               |
| Indirect Costs incurred by trade restrictions per year in each scenario                                         | IC <sub>Tr<sub>y,s</sub></sub>                                       | Triangular distribution (100;115;118) | Based on (Anonymus, 2016), we assumed that within 40 days of quarantine, each affected farm would want to move <u>three pregnant and three non-pregnant animals</u> . This implies the following costs for three pregnant and three non-pregnant animals respectively: travel 10 €, taking blood samples 10 €, handling and shipping samples 9 €, laboratory analysis 30 € (3x10 €). Hence, the movement ban would result in 118 € (2x59 €) additional veterinary costs per affected premise. |

Anonymus, 2001. Position paper of the EU Thematic network on control of bovine viral diarrhoea virus (BVDV).

Anonymus, 2010. Antwort auf die Kleine Anfrage Drucksache 17/3263 Ohrstanz-Gewebeprobe bei Rindern im Rahmen der BVD-Impfung.

Anonymus, 2016. Zweite Verordnung zur Änderung der BVDV-Verordnung. Drucksache 200/16 vom 20.04.16.

Burgstaller, J., Obritzhauser, W., Kuchling, S., Kopacka, I., Pinior, B., Köfer, J., 2016. The effect of bovine viral diarrhoea virus on fertility in dairy cows: two case-control studies in the province of Styria, Austria. Berl Münch Tierärztl Wochenschr 129, 103-110.

Pape, K.-R., 2000. BVD-Bekämpfung: Worüber die Experten streiten. Top agrar 6, 18-21.

Viet, A.F., Fourichon, C., Seegers, H., Jacob, C., Guihenneuc-Jouyaux, C., 2004. A model of the spread of the bovine viral-diarrhoea virus within a dairy herd. Prev Vet Med 63, 211-236.

Table S4: Equations used in the benefit-cost analysis

| Parameter                           | Notation  | Equation                                                                                                                 |
|-------------------------------------|-----------|--------------------------------------------------------------------------------------------------------------------------|
| Benefit-Cost Ratio in each scenario | $BCR_s$   | $BCR_s = \frac{\sum_{y=2011}^{2030} B_{y,s}}{\sum_{y=2011}^{2030} IC_{y,s}}$                                             |
| Present Value Benefit               | $PVB_s$   | $PVB_s = \sum_{y=2011}^{2030} \frac{B_{y,s}}{(1+r)^{(y-2011)}}$                                                          |
| Benefit per year                    | $B_{y,s}$ | $B_{y,s} = DC_{y,s1} - DC_{y,s}$                                                                                         |
| Interest rate                       | $r$       | $r = 3\%$                                                                                                                |
| Present Value Indirect Costs        | $PVIC_s$  | $PVIC_s = \sum_{y=2011}^{2030} \frac{IC_{y,s}}{(1+r)^{(y-2011)}}$                                                        |
| Net value                           | $NV_s$    | $NV_s = \sum_{y=2011}^{2030} B_{y,s} - \sum_{y=2011}^{2030} IC_{y,s}$                                                    |
| Net present value                   | $NPV_s$   | $NPV_s = \sum_{y=2011}^{2030} \frac{B_{y,s}}{(1+r)^{(y-2011)}} - \sum_{y=2011}^{2030} \frac{IC_{y,s}}{(1+r)^{(y-2011)}}$ |

Table S5: Probability of transient BVDV infections per pregnancy stage (and overall probability).

| effect                                 | Pregnancy stage    |                    |                    |                    | Post partum        |
|----------------------------------------|--------------------|--------------------|--------------------|--------------------|--------------------|
|                                        | days 0 - 70        | days 71 - 120      | days 121 - 180     | days 181 - 285     | days 286 - 385     |
| birth of a PI calf                     | 0.90 (0.16)        | 0.45 (0.06)        | 0.00 (0.00)        | 0.00 (0.00)        | 0.00 (0.00)        |
| abortion. stillbirth                   | 0.10 (0.02)        | 0.15 (0.02)        | 0.20 (0.03)        | 0.05 (0.01)        | 0.00 (0.00)        |
| congenital defects. growth retardation | 0.00 (0.00)        | 0.15 (0.02)        | 0.25 (0.04)        | 0.15 (0.04)        | 0.00 (0.00)        |
| Immune                                 | 0.00 (0.00)        | 0.25 (0.03)        | 0.55 (0.09)        | 0.80 (0.22)        | 0.00 (0.00)        |
| no effect                              | 0.00 (0.00)        | 0.00 (0.00)        | 0.00 (0.00)        | 0.00 (0.00)        | 1.00 (0.26)        |
| <b>total</b>                           | <b>1.00 (0.18)</b> | <b>1.00 (0.13)</b> | <b>1.00 (0.16)</b> | <b>1.00 (0.27)</b> | <b>1.00 (0.26)</b> |

Table S6: Prolongation of the calving interval (Ci) due to a transient BVDV infection on the foetus

|                                                               | days 0 - 70 | days 71 - 120 | days 121 - 180 | days 181 - 285 | days 286 - 385 | total average prolongation of the Ci (days) |
|---------------------------------------------------------------|-------------|---------------|----------------|----------------|----------------|---------------------------------------------|
| average prolongation of the Ci (days)                         | 35          | 95            | 150            | 233            | 335            |                                             |
| probability of outcome of abortion. stillbirth (see table S5) | 0.02        | 0.02          | 0.03           | 0.01           | 0.00           |                                             |
| prolongation of the Ci (days)                                 | 0.64        | 1.85          | 4.68           | 3.17           | 0.00           | <b>10.33</b>                                |

Table S7: Results of the economic model: Mean total costs (million Euros), thereof direct and indirect costs (million Euros).

| scenario | costs          | 2011 | 2012 | 2013 | 2014 | 2015 | 2016 | 2017 | 2018 | 2019 | 2020 | 2021 | 2022 | 2023 | 2024 | 2025 | 2026 | 2027 | 2028 | 2029 | 2030 |
|----------|----------------|------|------|------|------|------|------|------|------|------|------|------|------|------|------|------|------|------|------|------|------|
| sc1      | total costs    | 129  | 129  | 132  | 122  | 122  | 120  | 118  | 117  | 117  | 115  | 113  | 108  | 106  | 105  | 103  | 104  | 99   | 100  | 100  | 100  |
|          | direct costs   | 129  | 129  | 132  | 122  | 122  | 120  | 118  | 117  | 117  | 115  | 113  | 108  | 106  | 105  | 103  | 104  | 99   | 100  | 100  | 100  |
| sc 2     | total costs    | 195  | 146  | 117  | 109  | 99   | 92   | 87   | 86   | 87   | 88   | 86   | 84   | 83   | 82   | 82   | 82   | 83   | 82   | 81   | 80   |
|          | direct costs   | 105  | 55   | 31   | 26   | 19   | 14   | 11   | 10   | 11   | 11   | 9    | 8    | 7    | 6    | 6    | 7    | 7    | 6    | 5    | 5    |
|          | indirect costs | 91   | 91   | 86   | 83   | 80   | 78   | 77   | 76   | 76   | 77   | 76   | 76   | 76   | 76   | 76   | 75   | 76   | 76   | 75   | 75   |
| sc 3     | total costs    | 195  | 146  | 117  | 109  | 99   | 91   | 87   | 86   | 87   | 86   | 85   | 83   | 81   | 81   | 81   | 79   | 79   | 80   | 79   | 79   |
|          | direct costs   | 105  | 55   | 31   | 26   | 19   | 13   | 10   | 10   | 10   | 10   | 9    | 7    | 6    | 5    | 5    | 4    | 4    | 4    | 4    | 4    |
|          | indirect costs | 90   | 91   | 86   | 83   | 80   | 78   | 77   | 76   | 76   | 77   | 76   | 76   | 75   | 75   | 75   | 75   | 75   | 75   | 75   | 75   |
| sc 4     | total costs    | 195  | 146  | 117  | 108  | 99   | 91   | 79   | 53   | 78   | 71   | 46   | 37   | 39   | 39   | 36   | 35   | 36   | 38   | 35   | 36   |
|          | direct costs   | 104  | 56   | 31   | 26   | 19   | 13   | 17   | 53   | 78   | 71   | 46   | 37   | 39   | 39   | 36   | 35   | 36   | 38   | 35   | 36   |
|          | indirect costs | 90   | 90   | 86   | 83   | 80   | 78   | 62   | 0    | 0    | 0    | 0    | 0    | 0    | 0    | 0    | 0    | 0    | 0    | 0    | 0    |
| sc 5     | total costs    | 195  | 146  | 117  | 109  | 99   | 92   | 87   | 92   | 109  | 118  | 125  | 132  | 137  | 138  | 138  | 138  | 138  | 138  | 139  | 138  |
|          | direct costs   | 105  | 55   | 31   | 26   | 19   | 13   | 10   | 10   | 10   | 5    | 1    | 0    | 0    | 0    | 0    | 0    | 0    | 0    | 0    | 0    |
|          | indirect costs | 91   | 91   | 86   | 83   | 80   | 78   | 77   | 82   | 99   | 113  | 123  | 132  | 137  | 138  | 138  | 138  | 138  | 139  | 138  | 138  |
| sc 6     | total costs    | 195  | 147  | 118  | 109  | 99   | 91   | 89   | 310  | 283  | 256  | 238  | 221  | 209  | 200  | 195  | 190  | 184  | 177  | 174  | 171  |
|          | direct costs   | 104  | 56   | 32   | 26   | 19   | 13   | 12   | 10   | 11   | 11   | 11   | 10   | 8    | 7    | 6    | 6    | 5    | 5    | 4    | 5    |
|          | indirect costs | 91   | 91   | 86   | 83   | 80   | 78   | 77   | 300  | 272  | 244  | 227  | 211  | 201  | 193  | 189  | 184  | 179  | 172  | 170  | 166  |
| sc 7     | total costs    | 195  | 146  | 118  | 109  | 99   | 92   | 89   | 178  | 162  | 152  | 141  | 130  | 122  | 119  | 116  | 113  | 112  | 109  | 105  | 104  |
|          | direct costs   | 104  | 56   | 32   | 26   | 19   | 13   | 12   | 10   | 10   | 11   | 11   | 9    | 7    | 6    | 6    | 6    | 6    | 5    | 4    | 4    |
|          | indirect costs | 91   | 91   | 86   | 83   | 80   | 78   | 77   | 168  | 152  | 141  | 130  | 121  | 115  | 113  | 110  | 108  | 107  | 104  | 101  | 100  |
| sc 8     | total costs    | 195  | 146  | 117  | 109  | 99   | 91   | 87   | 297  | 378  | 437  | 491  | 516  | 527  | 534  | 533  | 534  | 533  | 535  | 535  | 534  |
|          | direct costs   | 104  | 56   | 31   | 26   | 19   | 13   | 10   | 10   | 8    | 3    | 1    | 0    | 0    | 0    | 0    | 0    | 0    | 0    | 0    | 0    |
|          | indirect costs | 90   | 90   | 86   | 83   | 80   | 78   | 77   | 287  | 370  | 433  | 491  | 516  | 527  | 534  | 533  | 534  | 533  | 535  | 535  | 534  |
| sc 9     | total costs    | 195  | 146  | 118  | 109  | 99   | 91   | 85   | 116  | 124  | 131  | 138  | 146  | 150  | 151  | 151  | 151  | 151  | 151  | 151  | 151  |
|          | direct costs   | 105  | 55   | 31   | 26   | 19   | 13   | 9    | 10   | 8    | 3    | 1    | 0    | 0    | 0    | 0    | 0    | 0    | 0    | 0    | 0    |
|          | indirect costs | 90   | 91   | 86   | 83   | 80   | 78   | 76   | 106  | 116  | 127  | 137  | 145  | 150  | 151  | 151  | 151  | 151  | 151  | 151  | 151  |
| sc 10    | total costs    | 195  | 146  | 117  | 109  | 99   | 91   | 56   | 243  | 222  | 183  | 150  | 134  | 134  | 136  | 130  | 116  | 106  | 105  | 105  | 104  |
|          | direct costs   | 104  | 56   | 31   | 26   | 19   | 13   | 14   | 26   | 32   | 18   | 8    | 6    | 10   | 14   | 13   | 8    | 5    | 6    | 8    | 9    |

| scenario | costs          | 2011 | 2012 | 2013 | 2014 | 2015 | 2016 | 2017 | 2018 | 2019 | 2020 | 2021 | 2022 | 2023 | 2024 | 2025 | 2026 | 2027 | 2028 | 2029 | 2030 |
|----------|----------------|------|------|------|------|------|------|------|------|------|------|------|------|------|------|------|------|------|------|------|------|
|          | indirect costs | 91   | 91   | 86   | 83   | 80   | 78   | 42   | 217  | 190  | 165  | 142  | 128  | 124  | 122  | 117  | 108  | 101  | 99   | 96   | 95   |
| sc 11    | total costs    | 194  | 146  | 117  | 109  | 99   | 91   | 58   | 55   | 94   | 99   | 84   | 81   | 82   | 81   | 76   | 72   | 71   | 69   | 68   | 66   |
|          | direct costs   | 104  | 55   | 31   | 26   | 19   | 13   | 16   | 50   | 71   | 62   | 36   | 23   | 19   | 18   | 13   | 8    | 7    | 5    | 4    | 3    |
|          | indirect costs | 91   | 91   | 86   | 83   | 80   | 78   | 42   | 5    | 23   | 37   | 49   | 58   | 63   | 64   | 63   | 63   | 63   | 64   | 64   | 63   |
| sc 12    | total costs    | 194  | 145  | 117  | 108  | 99   | 91   | 87   | 59   | 63   | 81   | 84   | 76   | 78   | 75   | 73   | 70   | 68   | 67   | 66   | 65   |
|          | direct costs   | 104  | 56   | 31   | 26   | 19   | 13   | 10   | 15   | 41   | 44   | 36   | 19   | 15   | 12   | 10   | 7    | 5    | 4    | 3    | 2    |
|          | indirect costs | 90   | 90   | 86   | 83   | 80   | 78   | 77   | 44   | 22   | 37   | 48   | 57   | 62   | 63   | 63   | 63   | 63   | 63   | 63   | 63   |
| sc 13    | total costs    | 195  | 146  | 117  | 109  | 99   | 91   | 54   | 62   | 142  | 155  | 153  | 156  | 158  | 159  | 159  | 158  | 158  | 159  | 158  | 158  |
|          | direct costs   | 104  | 56   | 31   | 26   | 19   | 13   | 11   | 16   | 27   | 16   | 4    | 1    | 0    | 0    | 0    | 0    | 0    | 0    | 0    | 0    |
|          | indirect costs | 90   | 90   | 86   | 83   | 80   | 78   | 43   | 47   | 115  | 139  | 149  | 155  | 158  | 159  | 159  | 158  | 158  | 159  | 158  | 158  |
